# Supplementary material for: Prediction of donor–acceptor-type novel noble gas complexes in the triplet electronic state
Source: Royal Society of Chemistry journal article supplement (doi:10.1039/d2cp05813h), 2023-01-01
Supplement: d2cp05813h1.pdf [file d2cp05813h1.pdf]

## **Electronic Supplementary Information**

### **Prediction of Donor-Acceptor Type Novel Noble Gas Complexes in the Triplet Electronic State**

**Subrahmanya Prasad Kuntar<sup>[a,b]</sup>, Ayan Ghosh<sup>[a,c]</sup>, and Tapan K. Ghanty<sup>\*[a,b]</sup>**

*<sup>a</sup>Homi Bhabha National Institute, Training School Complex, Anushakti Nagar,  
Mumbai 400 094, INDIA.*

*<sup>b</sup>Bio-Science Group, Bhabha Atomic Research Centre, Mumbai 400 085, INDIA.*

*<sup>c</sup>Laser and Plasma Technology Division, Beam Technology Development Group,  
Bhabha Atomic Research Centre, Mumbai 400 085, INDIA.*

## **List of Figures**

**Figure S1.** Molecular orbital pictures of highest occupied and lowest unoccupied molecular orbitals of precursor  $\text{BeN}^+$  ion and  $\text{NgBeN}^+$  ( $\text{Ng} = \text{Kr}$  and  $\text{Xe}$ ) complexes calculated using B3LYP method with DEF2 basis set. An isovalue of 0.02 has been used.

**Figure S2.** Optimized geometrical parameters of the minima state of (a)  $^1\text{NgNBe}^+$  and (b)  $^1\text{NgPBe}^+$  ( $\text{Ng} = \text{Ar-Rn}$ ), respectively, where the bond lengths are in Å and bond angles are in degrees. The values in black, blue, green, and red are computed for Ar, Kr, Xe, and Rn containing complexes, respectively, at the CCSD(T)/AVTZ level of theory.

**Figure S3.** Graphical representation of the energy levels of bare  $\text{BeN}^+$  ions and Ar bound  $\text{BeN}^+$  complexes in their singlet and triplet potential energy surfaces. All geometries are optimized at CCSD(T)/AVTZ level.

**Figure S4.** Potential energy profiles for both Singlet and Triplet (a)  $\text{XeBeN}^+$ , (b)  $\text{XeBeP}^+$  at the CCSD(T)/AVTZ level. The Be–Y bond distance has been fixed at 1.584 and 1.988 Å for calculations of  $\text{XeBeN}^+$  and  $\text{XeBeP}^+$  potential energy profiles, respectively.

**Figure S5.** Plot of deformation densities  $\Delta\rho(r)$ , of the pair-wise orbital interactions in the predicted  $\text{NgBeN}^+$  ( $\text{Ng} = \text{Kr}$  and  $\text{Xe}$ ) complexes at the B3LYP-D3/TZ2P level, where  $\Delta\rho_1(r)$ ,  $\Delta\rho_2(r)$ , and  $\Delta\rho_3(r)$ , are the deformation density corresponding to  $\text{Ng} \rightarrow \text{BeN}^+$  ( $\text{Ng} = \text{Kr}$  and  $\text{Xe}$ )  $\sigma$ -,  $\pi$ -, and  $\pi$ -donations, respectively, while  $\Delta\rho_4(r)$ , corresponds to  $\text{Ng} \leftarrow \text{BeN}^+$  ( $\text{Ng} = \text{Kr}$  and  $\text{Xe}$ )  $\sigma$ -back donation. The associated orbital interaction energies are provided in kcal  $\text{mol}^{-1}$ . The direction of the charge flow is from red to blue region.

**Figure S6.** Plot of deformation densities  $\Delta\rho(r)$ , of the pair-wise orbital interactions in the predicted  $\text{NgBeP}^+$  ( $\text{Ng} = \text{Kr}$  and  $\text{Xe}$ ) complexes at the B3LYP-D3/TZ2P level, where  $\Delta\rho_1(r)$ ,  $\Delta\rho_2(r)$ , and  $\Delta\rho_3(r)$ , are the deformation density corresponding to  $\text{Ng} \rightarrow \text{BeP}^+$  ( $\text{Ng} = \text{Kr}$  and  $\text{Xe}$ )  $\sigma$ -,  $\pi$ -, and  $\pi$ -donations, respectively, while  $\Delta\rho_4(r)$ , corresponds to  $\text{Ng} \leftarrow \text{BeP}^+$  ( $\text{Ng} = \text{Kr}$  and  $\text{Xe}$ )  $\sigma$ -back donation. The associated orbital interaction energies are provided in kcal  $\text{mol}^{-1}$ . The direction of the charge flow is from red to blue region.

## **List of Tables**

**Table S1.** Calculated Values of Ng–Be, Be–N Bond Lengths (R in Å) and Ng–Be–N Bond Angles ( $\theta$  in Degrees) in the Predicted NgBeN<sup>+</sup> (Ng = He–Rn) Complexes in their Triplet Electronic State as Obtained by Using B3LYP and MP2 Methods with the DEF2 Basis Set, CCSD(T) and MRCI method with AVTZ Basis Sets.

**Table S2.** Calculated Values of Ng–Be, Be–P Bond Lengths (R in Å) and Ng–Be–P Bond Angles ( $\theta$  in Degrees) in the Predicted NgBeP<sup>+</sup> (Ng = He–Rn) Complexes in their Triplet Electronic State as Obtained by Using B3LYP and MP2 Methods with the DEF2 Basis Set and CCSD(T) and MRCI method with AVTZ Basis Sets.

**Table S3.** Comparative Accounts of Be–Y Bond Lengths (R in Å), Be–Y Stretching Frequency (in cm<sup>-1</sup>), and the Mulliken Charges on the Constituent Atoms in the Precursor BeY<sup>+</sup> with the NgBeY<sup>+</sup> (Ng = He–Rn; Y = N and P) Complexes in their Triplet Electronic State as Obtained by Using B3LYP and MP2 Methods with the DEF2 Basis Set.

**Table S4.** Calculated Values of Ng–Be Stretching Frequency, Be–Y Stretching Frequency and Ng–Be–Y Bending Frequency (in cm<sup>-1</sup>) in the Predicted NgBeY<sup>+</sup> (Ng = He–Rn; Y = N and P) Complexes in their Triplet Electronic State as Obtained by Using B3LYP and MP2 Methods with the DEF2 Basis Set and the Corresponding IR Intensities (in km mol<sup>-1</sup>) are Provided within the Parenthesis.

**Table S5.** Calculated Values of the Harmonic Vibrational Frequencies (in cm<sup>-1</sup>) and Intrinsic Force Constants in the Parentheses (in N m<sup>-1</sup>) Corresponding to Individual Internal Coordinates of NgBeY<sup>+</sup> (Ng = He, Ne, Ar, Kr, Xe, and Rn; Y = N and P) Complexes using B3LYP and MP2 Methods with DEF2 Basis Sets.

**Table S6.** Calculated Values of Ng–Be Binding Energies (BE) (in kJ mol<sup>-1</sup>) in the Predicted NgBeY<sup>+</sup> (Ng = He–Rn; Y = N and P) Complexes as Obtained by Using B3LYP and MP2 Methods with the DEF2 Basis Set and CCSD(T) and MRCI Methods with AVTZ Basis Set.

**Table S7.** Calculated Values of Mulliken Atomic Spin Population on the Constituting Atoms in the bare BeY<sup>+</sup> Ions and Predicted NgBeY<sup>+</sup> (Ng = He–Rn; Y = N and P) Complexes in their

Triplet Electronic State as Obtained by Using B3LYP and MP2 Methods with the DEF2 Basis Set.

**Table S8.** Calculated Values of Mulliken Charges on the Constituting Atoms in the Predicted NgBeY<sup>+</sup> (Ng = He–Rn; Y = N and P) Complexes in their Triplet Electronic State as Obtained by Using B3LYP and MP2 Methods with the DEF2 Basis Set.

**Table S9.** Calculated Values of Natural Bonding Orbital (NBO) Charges on the Constituting Atoms in the Predicted NgBeY<sup>+</sup> (Ng = He–Rn; Y = N and P) Complexes in their Triplet Electronic State as Obtained by Using B3LYP Method with the DEF2 Basis Set.

**Table S10.** Calculated Values of Atoms-in-Molecule (AIM) Charges on the Constituting Atoms in the Predicted NgBeY<sup>+</sup> (Ng = He–Rn; Y = N and P) Complexes in their Triplet Electronic State as Obtained by Using B3LYP Method with the DEF2 Basis Set.

**Table S11.** Calculated Values of Ng–Y Bond Lengths (R in Å), Binding Energies (BE in kJ mol<sup>-1</sup>), and Harmonic Vibrational Frequencies ( $\nu$  in cm<sup>-1</sup>) in the Singlet State of Bent NgYBe<sup>+</sup> (Ng = Ar, Kr, Xe, and Rn; Y = N and P) Complexes as Obtained by Using CCSD(T) Method with AVTZ Basis Set.

**Table S12.** Relative Energies (in kJ mol<sup>-1</sup>) of the Predicted NgBeY<sup>+</sup> (Ng = Ar, Kr, Xe, and Rn; Y = N and P) in the Singlet and Triplet Electronic States and the Singlet NgYBe<sup>+</sup> Isomer Calculated by Using CCSD(T) Method with AVTZ Basis Set.

**Table S13.** Calculated Values of Ng–M Bond Critical Point (BCP) Electron Density ( $\rho$  in e a<sub>0</sub><sup>-3</sup>), Laplacian of Electron Density ( $\nabla^2\rho$  in e a<sub>0</sub><sup>-5</sup>), the Local Electron Energy Density ( $E_d$  in au), and Ratio of Local Electron Kinetic Energy Density and Electron Density ( $G/\rho$  in au) in the Predicted NgBeY<sup>+</sup> (Ng = He–Rn; Y = N and P) Complexes in their Triplet Electronic State as Obtained by Using B3LYP and MP2 Methods with the DEF2 Basis Set.

| Energy Levels | BeN <sup>+</sup>                                                                    | KrBeN <sup>+</sup>                                                                  | XeBeN <sup>+</sup>                                                                    |
|---------------|-------------------------------------------------------------------------------------|-------------------------------------------------------------------------------------|---------------------------------------------------------------------------------------|
| HOMO-1        | 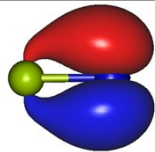   |    |    |
| HOMO          |    |    |    |
| LUMO          |    |   |    |
| LUMO+1        |  |  |  |

**Figure S1.** Molecular orbital pictures of highest occupied and lowest unoccupied molecular orbitals of precursor BeN<sup>+</sup> ion and NgBeN<sup>+</sup> (Ng = Kr and Xe) complexes calculated using B3LYP method with DEF2 basis set. An isovalue of 0.02 has been used.

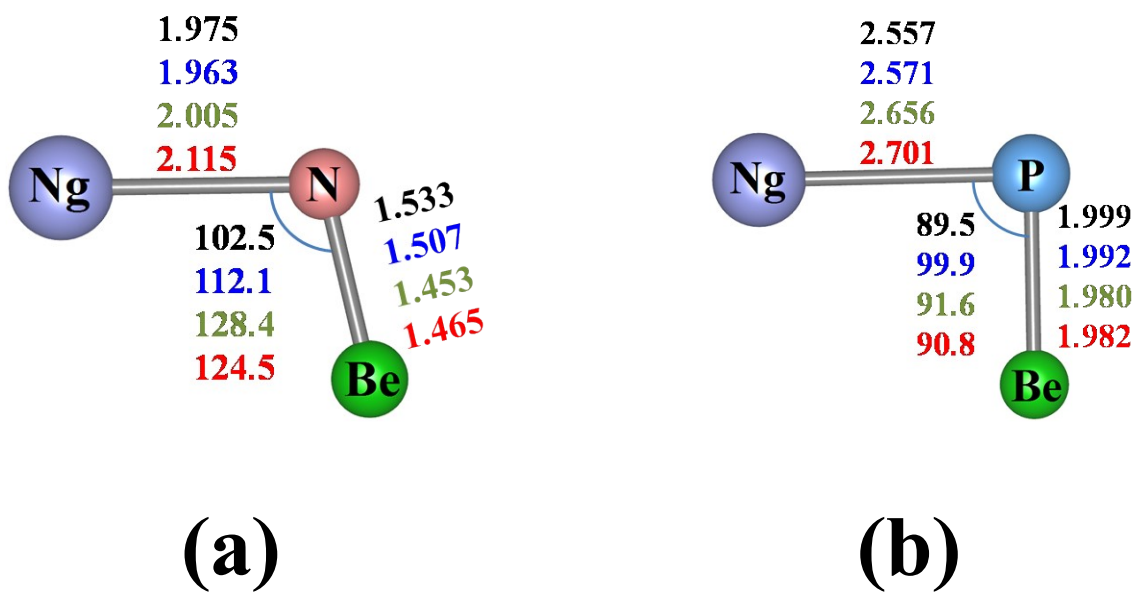

**Figure S2.** Optimized geometrical parameters of the minima state of (a)  $^1\text{NgNBe}^+$  and (b)  $^1\text{NgPBe}^+$  ( $\text{Ng} = \text{Ar-Rn}$ ), respectively, where the bond lengths are in Å and bond angles are in degrees. The values in black, blue, green, and red are computed for Ar, Kr, Xe, and Rn containing complexes, respectively, at the CCSD(T)/AVTZ level of theory.

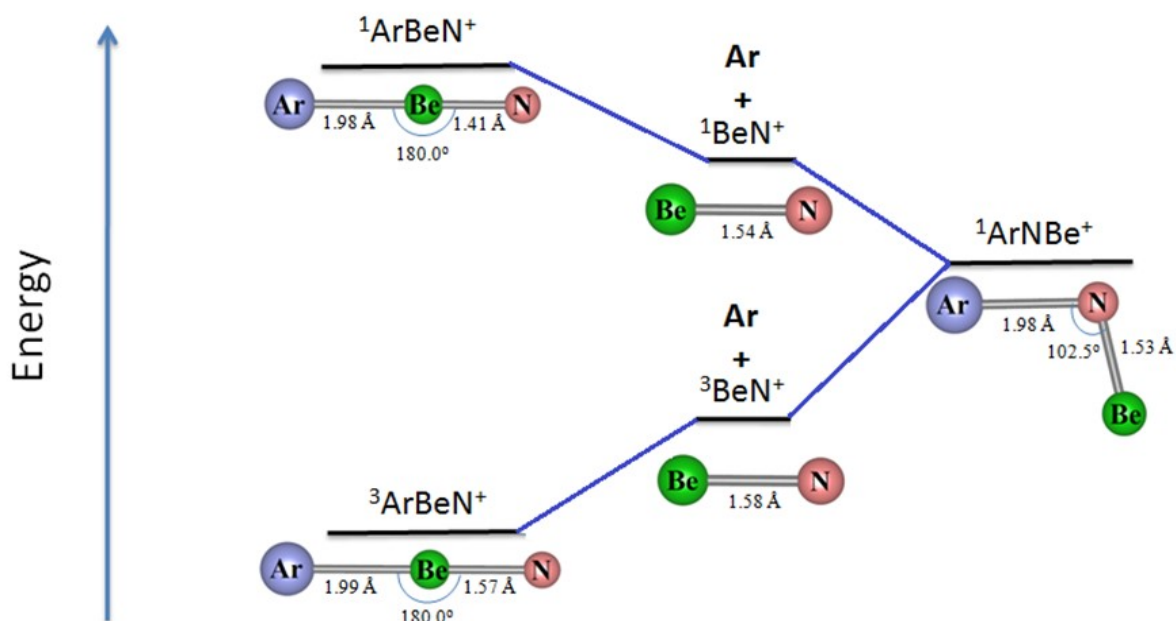

**Figure S3.** Graphical representation of the energy levels of bare  $\text{BeN}^+$  ions and Ar bound  $\text{BeN}^+$  complexes in their singlet and triplet potential energy surfaces. All geometries are optimized at CCSD(T)/AVTZ level.

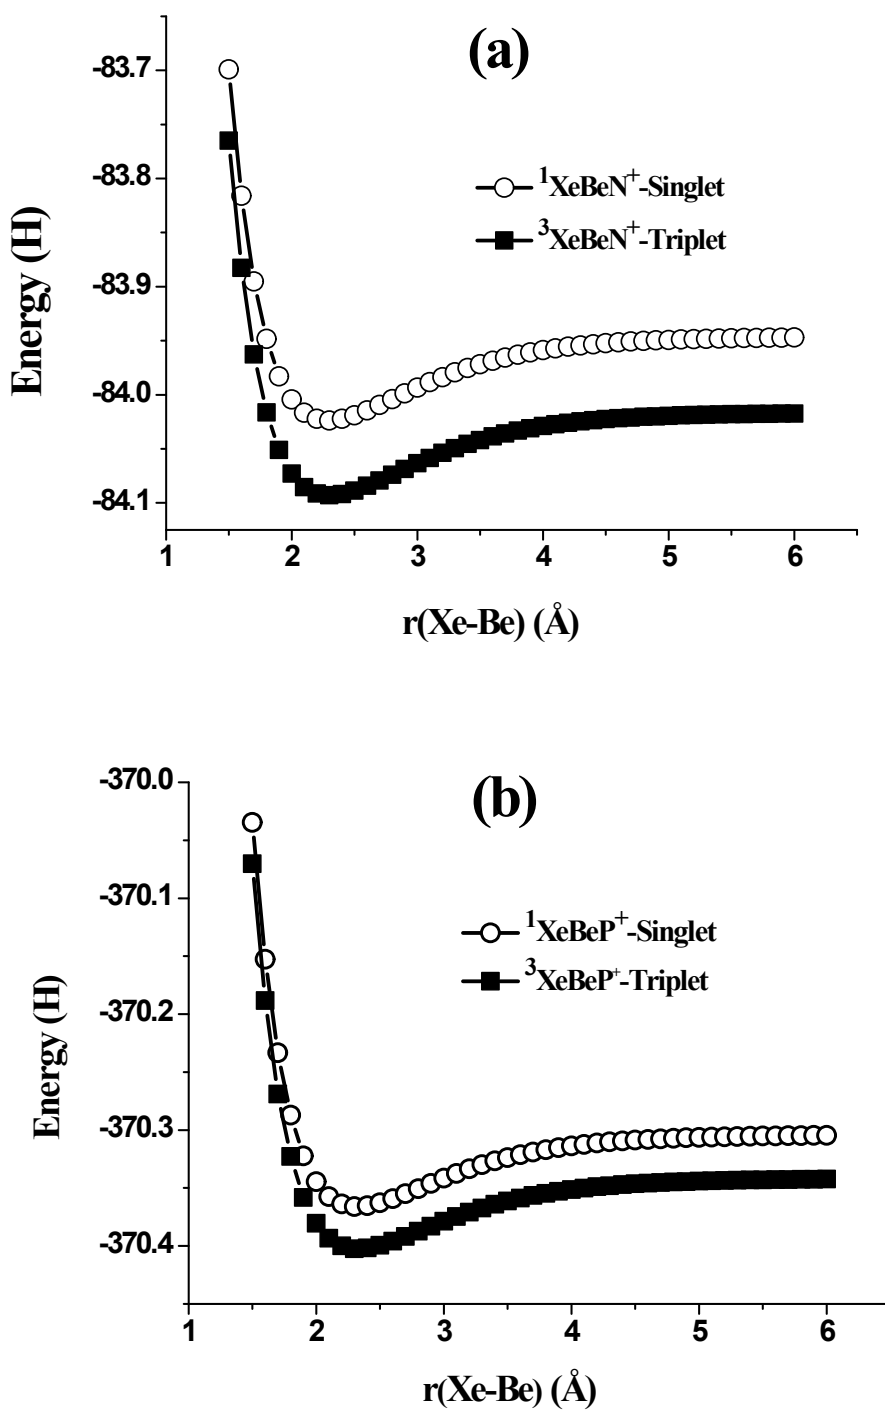

**Figure S4.** Potential energy profiles for both Singlet and Triplet (a)  $\text{XeBeN}^+$ , (b)  $\text{XeBeP}^+$  at the CCSD(T)/AVTZ level. The Be–Y bond distance has been fixed at 1.584 and 1.988 Å for calculations of  $\text{XeBeN}^+$  and  $\text{XeBeP}^+$  potential energy profiles, respectively.



### KrBeN<sup>+</sup> (Kr + BeN<sup>+</sup>)

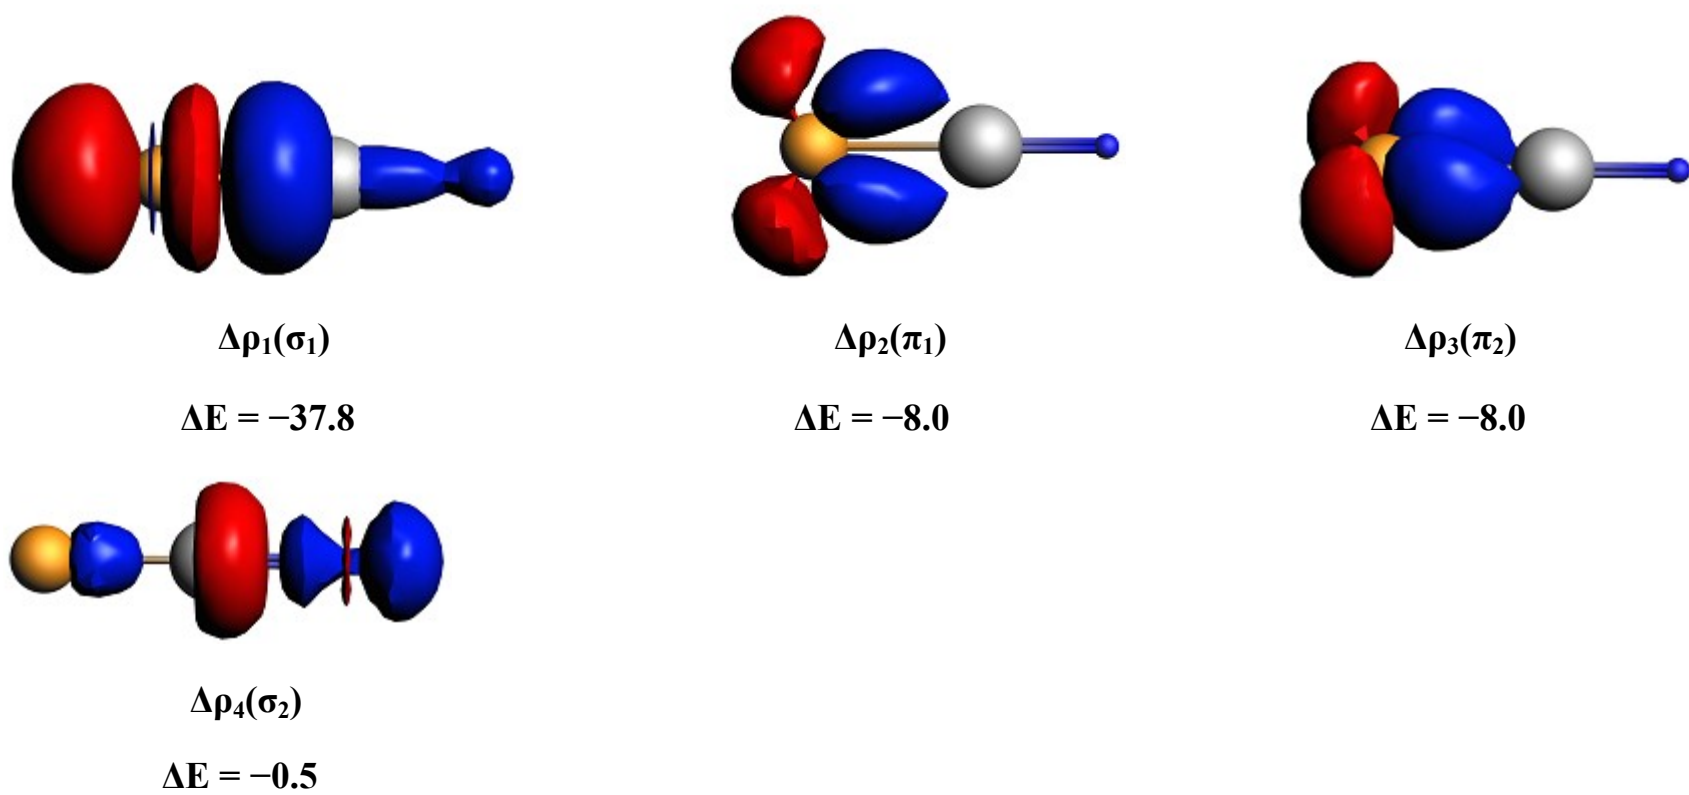

### XeBeN<sup>+</sup> (Xe + BeN<sup>+</sup>)

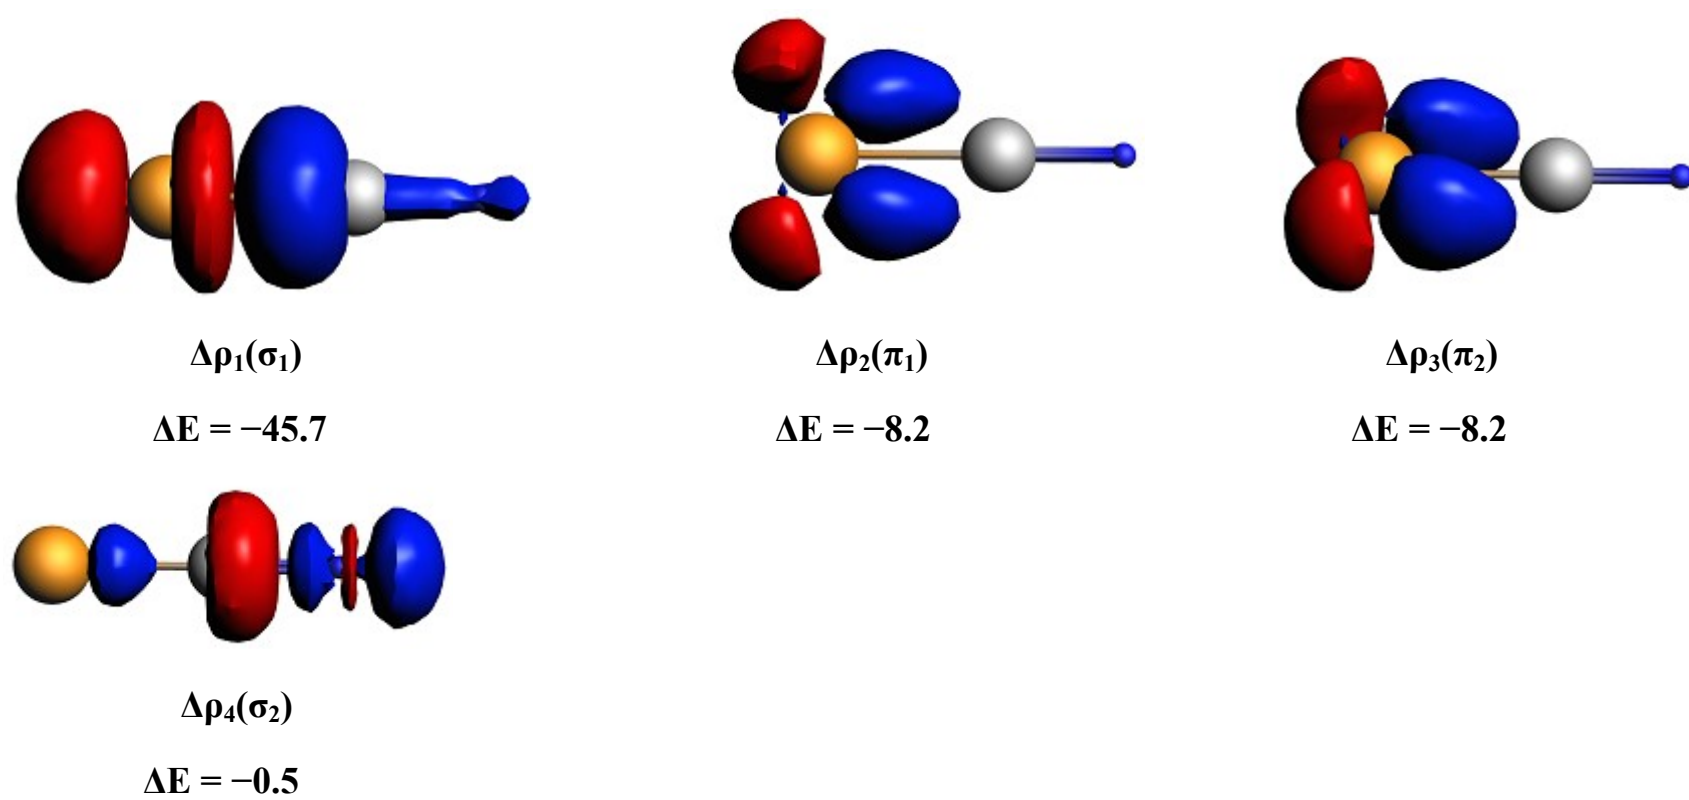

**Figure S5.** Plot of deformation densities  $\Delta\rho(r)$ , of the pair-wise orbital interactions in the predicted NgBeN<sup>+</sup> (Ng = Kr and Xe) complexes at the B3LYP-D3/TZ2P level, where  $\Delta\rho_1(r)$ ,  $\Delta\rho_2(r)$ , and  $\Delta\rho_3(r)$ , are the deformation density corresponding to Ng  $\rightarrow$  BeN<sup>+</sup> (Ng = Kr and Xe)  $\sigma$ -,  $\pi$ -, and  $\pi$ -donations, respectively, while  $\Delta\rho_4(r)$ , corresponds to Ng  $\leftarrow$  BeN<sup>+</sup> (Ng = Kr and Xe)  $\sigma$ -back donation. The associated orbital interaction energies are provided in kcal mol<sup>-1</sup>. The direction of the charge flow is from red to blue region.

### KrBeP<sup>+</sup> (Kr + BeP<sup>+</sup>)

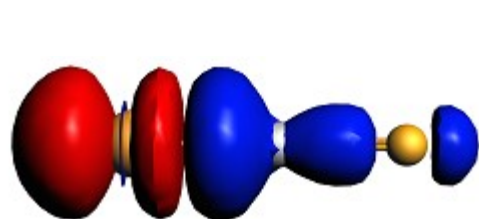

$$\Delta\rho_1(\sigma_1)$$

$$\Delta E = -33.2$$

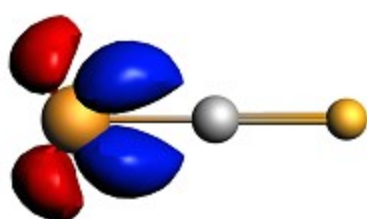

$$\Delta\rho_2(\pi_1)$$

$$\Delta E = -8.5$$

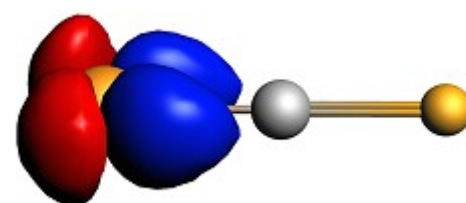

$$\Delta\rho_3(\pi_2)$$

$$\Delta E = -8.5$$

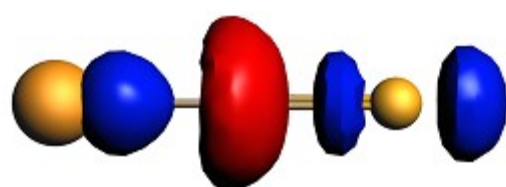

$$\Delta\rho_4(\sigma_2)$$

$$\Delta E = -1.3$$

### XeBeP<sup>+</sup> (Xe + BeP<sup>+</sup>)

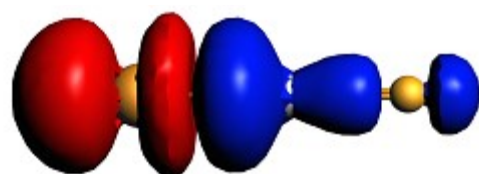

$$\Delta\rho_1(\sigma_1)$$

$$\Delta E = -40.0$$

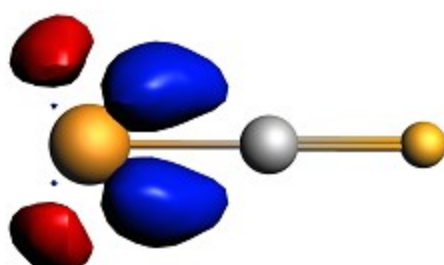

$$\Delta\rho_2(\pi_1)$$

$$\Delta E = -9.0$$

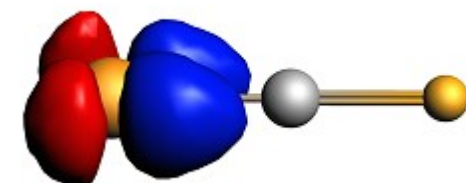

$$\Delta\rho_3(\pi_2)$$

$$\Delta E = -9.0$$

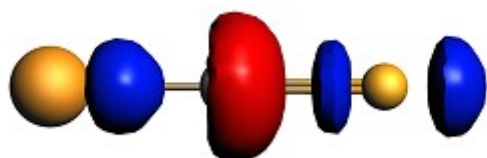

$$\Delta\rho_4(\sigma_2)$$

$$\Delta E = -1.3$$

**Figure S6.** Plot of deformation densities  $\Delta\rho(r)$ , of the pair-wise orbital interactions in the predicted NgBeP<sup>+</sup> (Ng = Kr and Xe) complexes at the B3LYP-D3/TZ2P level, where  $\Delta\rho_1(r)$ ,  $\Delta\rho_2(r)$ , and  $\Delta\rho_3(r)$ , are the deformation density corresponding to Ng  $\rightarrow$  BeP<sup>+</sup> (Ng = Kr and Xe)  $\sigma$ -,  $\pi$ -, and  $\pi$ -donations, respectively, while  $\Delta\rho_4(r)$ , corresponds to Ng  $\leftarrow$  BeP<sup>+</sup> (Ng = Kr and Xe)  $\sigma$ -back donation. The associated orbital interaction energies are provided in kcal mol<sup>-1</sup>. The direction of the charge flow is from red to blue region.

**Table S1. Calculated Values of Ng–Be, Be–N Bond Lengths (R in Å) and Ng–Be–N Bond Angles ( $\theta$  in Degrees) in the Predicted NgBeN<sup>+</sup> (Ng = He–Rn) Complexes in their Triplet Electronic State as Obtained by Using B3LYP and MP2 Methods with the DEF2 Basis Set, CCSD(T) and MRCI method with AVTZ Basis Sets.**

| Complexes          | Method  | R (Ng–Be) | R (Be–N) | $\theta$ (Ng–Be–N) |
|--------------------|---------|-----------|----------|--------------------|
| HeBeN <sup>+</sup> | B3LYP   | 1.517     | 1.564    | 180.0              |
|                    | MP2     | 1.524     | 1.571    | 180.0              |
|                    | CCSD(T) | 1.518     | 1.581    | 180.0              |
|                    | MRCI    | 1.518     | 1.582    | 180.0              |
| NeBeN <sup>+</sup> | B3LYP   | 1.720     | 1.568    | 180.0              |
|                    | MP2     | 1.729     | 1.574    | 180.0              |
|                    | CCSD(T) | 1.684     | 1.583    | 180.0              |
|                    | MRCI    | 1.657     | 1.568    | 180.0              |
| ArBeN <sup>+</sup> | B3LYP   | 1.989     | 1.568    | 180.0              |
|                    | MP2     | 1.997     | 1.574    | 180.0              |
|                    | CCSD(T) | 1.980     | 1.583    | 180.0              |
|                    | MRCI    | 1.961     | 1.574    | 180.0              |
| KrBeN <sup>+</sup> | B3LYP   | 2.135     | 1.569    | 180.0              |
|                    | MP2     | 2.143     | 1.576    | 180.0              |
|                    | CCSD(T) | 2.118     | 1.584    | 180.0              |
|                    | MRCI    | 2.115     | 1.584    | 180.0              |
| XeBeN <sup>+</sup> | B3LYP   | 2.321     | 1.570    | 180.0              |
|                    | MP2     | 2.333     | 1.577    | 180.0              |
|                    | CCSD(T) | 2.304     | 1.584    | 180.0              |
|                    | MRCI    | 2.291     | 1.589    | 180.0              |
| RnBeN <sup>+</sup> | B3LYP   | 2.405     | 1.571    | 180.0              |
|                    | MP2     | 2.415     | 1.578    | 180.0              |
|                    | CCSD(T) | 2.388     | 1.585    | 180.0              |
|                    | MRCI    | 2.368     | 1.583    | 180.0              |

**Table S2. Calculated Values of Ng–Be, Be–P Bond Lengths (R in Å) and Ng–Be–P Bond Angles ( $\theta$  in Degrees) in the Predicted NgBeP<sup>+</sup> (Ng = He–Rn) Complexes in their Triplet Electronic State as Obtained by Using B3LYP and MP2 Methods with the DEF2 Basis Set and CCSD(T) and MRCI method with AVTZ Basis Sets.**

| Complexes          | Method  | R (Ng–Be) | R (Be–P) | $\theta$ (Ng–Be–P) |
|--------------------|---------|-----------|----------|--------------------|
| HeBeP <sup>+</sup> | B3LYP   | 1.590     | 1.994    | 180.0              |
|                    | MP2     | 1.613     | 2.008    | 180.0              |
|                    | CCSD(T) | 1.578     | 2.007    | 180.0              |
|                    | MRCI    | 1.593     | 2.009    | 180.0              |
| NeBeP <sup>+</sup> | B3LYP   | 1.797     | 2.000    | 180.0              |
|                    | MP2     | 1.807     | 2.013    | 180.0              |
|                    | CCSD(T) | 1.730     | 2.012    | 180.0              |
|                    | MRCI    | 1.724     | 1.997    | 180.0              |
| ArBeP <sup>+</sup> | B3LYP   | 2.033     | 1.998    | 180.0              |
|                    | MP2     | 2.037     | 2.010    | 180.0              |
|                    | CCSD(T) | 2.014     | 2.009    | 180.0              |
|                    | MRCI    | 2.067     | 2.008    | 180.0              |
| KrBeP <sup>+</sup> | B3LYP   | 2.178     | 2.000    | 180.0              |
|                    | MP2     | 2.181     | 2.011    | 180.0              |
|                    | CCSD(T) | 2.151     | 2.011    | 180.0              |
|                    | MRCI    | 2.221     | 2.010    | 180.0              |
| XeBeP <sup>+</sup> | B3LYP   | 2.364     | 2.002    | 180.0              |
|                    | MP2     | 2.370     | 2.014    | 180.0              |
|                    | CCSD(T) | 2.327     | 2.012    | 180.0              |
|                    | MRCI    | 2.328     | 2.005    | 180.0              |
| RnBeP <sup>+</sup> | B3LYP   | 2.447     | 2.005    | 180.0              |
|                    | MP2     | 2.449     | 2.016    | 180.0              |
|                    | CCSD(T) | 2.420     | 2.014    | 180.0              |
|                    | MRCI    | 2.404     | 2.007    | 180.0              |

**Table S3. Comparative Accounts of Be–Y Bond Lengths (R in Å), Be–Y Stretching Frequency (in cm<sup>-1</sup>), and the Mulliken Charges on the Constituent Atoms in the Precursor BeY<sup>+</sup> with the NgBeY<sup>+</sup> (Ng = He–Rn; Y = N and P) Complexes in their Triplet Electronic State as Obtained by Using B3LYP and MP2 Methods with the DEF2 Basis Set.**

| Complexes          | R (Be–N) |       | v (Be–N) |        | q(Be) |       | q(N)  |       |
|--------------------|----------|-------|----------|--------|-------|-------|-------|-------|
|                    | B3LYP    | MP2   | B3LYP    | MP2    | B3LYP | MP2   | B3LYP | MP2   |
| BeN <sup>+</sup>   | 1.580    | 1.585 | 984.1    | 993.5  | 0.697 | 0.809 | 0.303 | 0.191 |
| HeBeN <sup>+</sup> | 1.564    | 1.571 | 1048.8   | 1053.8 | 0.617 | 0.773 | 0.227 | 0.117 |
| NeBeN <sup>+</sup> | 1.568    | 1.574 | 1035.9   | 1043.7 | 0.624 | 0.773 | 0.235 | 0.122 |
| ArBeN <sup>+</sup> | 1.568    | 1.574 | 1042.4   | 1047.2 | 0.389 | 0.555 | 0.170 | 0.026 |
| KrBeN <sup>+</sup> | 1.569    | 1.576 | 1040.6   | 1045.3 | 0.321 | 0.475 | 0.173 | 0.073 |
| XeBeN <sup>+</sup> | 1.570    | 1.577 | 1038.1   | 1043.2 | 0.238 | 0.383 | 0.164 | 0.070 |
| RnBeN <sup>+</sup> | 1.571    | 1.578 | 1034.8   | 1040.2 | 0.251 | 0.381 | 0.155 | 0.060 |
| Complexes          | R (Be–P) |       | v (Be–P) |        | q(Be) |       | q(P)  |       |
|                    | B3LYP    | MP2   | B3LYP    | MP2    | B3LYP | MP2   | B3LYP | MP2   |
| BeP <sup>+</sup>   | 2.022    | 2.036 | 650.0    | 647.1  | 0.504 | 0.630 | 0.496 | 0.370 |
| HeBeP <sup>+</sup> | 1.994    | 2.008 | 719.7    | 718.6  | 0.419 | 0.608 | 0.456 | 0.312 |
| NeBeP <sup>+</sup> | 2.000    | 2.013 | 704.8    | 707.7  | 0.450 | 0.627 | 0.448 | 0.296 |
| ArBeP <sup>+</sup> | 1.998    | 2.010 | 714.5    | 715.9  | 0.247 | 0.449 | 0.373 | 0.213 |
| KrBeP <sup>+</sup> | 2.000    | 2.011 | 712.5    | 714.7  | 0.166 | 0.353 | 0.391 | 0.231 |
| XeBeP <sup>+</sup> | 2.002    | 2.014 | 709.4    | 712.4  | 0.065 | 0.236 | 0.401 | 0.245 |
| RnBeP <sup>+</sup> | 2.005    | 2.016 | 706.0    | 709.8  | 0.070 | 0.228 | 0.393 | 0.235 |

**Table S4. Calculated Values of Ng–Be Stretching Frequency, Be–Y Stretching Frequency and Ng–Be–Y Bending Frequency (in  $\text{cm}^{-1}$ ) in the Predicted  $\text{NgBeY}^+$  (Ng = He–Rn; Y = N and P) Complexes in their Triplet Electronic State as Obtained by Using B3LYP and MP2 Methods with the DEF2 Basis Set and the Corresponding IR Intensities (in  $\text{km mol}^{-1}$ ) are Provided within the Parenthesis.**

| Complexes          | Ng–Be Stretch |             | Be–N Stretch  |               | Ng–Be–N Bend |              |
|--------------------|---------------|-------------|---------------|---------------|--------------|--------------|
|                    | B3LYP         | MP2         | B3LYP         | MP2           | B3LYP        | MP2          |
| HeBeN <sup>+</sup> | 642.4(7.1)    | 617.1(8.4)  | 1048.8(94.5)  | 1053.8(105.4) | 157.5(88.1)  | 153.9(104.8) |
| NeBeN <sup>+</sup> | 444.9(27.4)   | 438.6(26.7) | 1035.9(92.5)  | 1043.7(103.1) | 133.6(136.1) | 134.4(156.6) |
| ArBeN <sup>+</sup> | 515.6(30.6)   | 515.2(31.0) | 1042.4(144.1) | 1047.2(159.8) | 149.6(104.9) | 151.1(121.9) |
| KrBeN <sup>+</sup> | 487.6(35.0)   | 491.5(35.5) | 1040.6(148.3) | 1045.3(167.4) | 148.1(96.8)  | 149.4(112.6) |
| XeBeN <sup>+</sup> | 469.0(34.0)   | 473.6(34.8) | 1038.1(150.1) | 1043.2(173.4) | 147.2(81.8)  | 151.1(95.5)  |
| RnBeN <sup>+</sup> | 455.0(33.8)   | 461.8(34.0) | 1034.8(143.9) | 1040.2(168.4) | 146.1(74.7)  | 150.8(87.0)  |
| Complexes          | Ng–Be Stretch |             | Be–P Stretch  |               | Ng–Be–P Bend |              |
|                    | B3LYP         | MP2         | B3LYP         | MP2           | B3LYP        | MP2          |
| HeBeP <sup>+</sup> | 493.3(8.1)    | 446.5(14.1) | 719.7(122.0)  | 718.6(137.0)  | 152.2(22.1)  | 143.6(30.4)  |
| NeBeP <sup>+</sup> | 364.3(19.0)   | 348.0(20.3) | 704.8(119.9)  | 707.7(129.6)  | 127.0(46.4)  | 115.1(57.2)  |
| ArBeP <sup>+</sup> | 455.9(16.8)   | 461.0(16.9) | 714.5(186.2)  | 715.9(204.9)  | 133.9(32.7)  | 133.9(41.3)  |
| KrBeP <sup>+</sup> | 437.9(20.0)   | 447.9(19.8) | 712.5(191.0)  | 714.7(213.1)  | 131.4(30.1)  | 131.3(38.0)  |
| XeBeP <sup>+</sup> | 426.5(19.9)   | 437.2(19.9) | 709.4(192.8)  | 712.4(218.9)  | 128.7(24.4)  | 130.5(31.0)  |
| RnBeP <sup>+</sup> | 416.6(20.7)   | 429.9(20.2) | 706.0(186.2)  | 709.8(211.4)  | 127.4(21.7)  | 129.8(27.4)  |

**Table S5. Calculated Values of the Harmonic Vibrational Frequencies (in  $\text{cm}^{-1}$ ) and Intrinsic Force Constants in the Parentheses (in  $\text{N m}^{-1}$ ) Corresponding to Individual Internal Coordinates of  $\text{NgBeY}^+$  ( $\text{Ng} = \text{He, Ne, Ar, Kr, Xe, and Rn}$ ;  $\text{Y} = \text{N and P}$ ) Complexes using B3LYP and MP2 Methods with DEF2 Basis Sets.**

| Complexes          | Ng–Be Stretch |               | Be–N Stretch  |                | Ng–Be–N Bend |       |
|--------------------|---------------|---------------|---------------|----------------|--------------|-------|
|                    | B3LYP         | MP2           | B3LYP         | MP2            | B3LYP        | MP2   |
| HeBeN <sup>+</sup> | 529.3(67.4)   | 514.1(62.2)   | 1110.2(355.3) | 1107.7(358.8)  | 157.5        | 153.9 |
| NeBeN <sup>+</sup> | 311.2(72.5)   | 309.2(70.4)   | 1083.6(346.7) | 1089.1(351.9)  | 133.6        | 134.4 |
| ArBeN <sup>+</sup> | 335.2(115.2)  | 337.2 (115.0) | 1113.6(351.0) | 1117.3 (354.3) | 149.6        | 151.1 |
| KrBeN <sup>+</sup> | 300.2(114.0)  | 304.8(115.8)  | 1109.3(349.8) | 1114.1(353.0)  | 148.1        | 149.4 |
| XeBeN <sup>+</sup> | 282.2(109.3)  | 287.9(115.5)  | 1103.5(348.2) | 1108.9(351.6)  | 147.2        | 151.1 |
| RnBeN <sup>+</sup> | 270.2(105.6)  | 276.5(108.8)  | 1097.7(345.9) | 1104.0(349.5)  | 146.1        | 150.8 |
| Complexes          | Ng–Be Stretch |               | Be–P Stretch  |                | Ng–Be–P Bend |       |
|                    | B3LYP         | MP2           | B3LYP         | MP2            | B3LYP        | MP2   |
| HeBeP <sup>+</sup> | 367.5(39.7)   | 338.3(32.6)   | 791.4(213.1)  | 775.4(212.4)   | 152.2        | 143.6 |
| NeBeP <sup>+</sup> | 214.6(48.6)   | 206.5(44.3)   | 763.8(204.3)  | 761.2(206.0)   | 127.0        | 115.1 |
| ArBeP <sup>+</sup> | 234.1(90.0)   | 237.5(92.1)   | 814.6(210.0)  | 817.7(210.8)   | 133.9        | 133.9 |
| KrBeP <sup>+</sup> | 204.0(91.9)   | 208.9(96.2)   | 811.1(208.8)  | 817.2(210.1)   | 131.4        | 131.3 |
| XeBeP <sup>+</sup> | 190.9(90.4)   | 196.0(95.0)   | 805.5(207.0)  | 812.5(208.7)   | 128.7        | 130.5 |
| RnBeP <sup>+</sup> | 180.5(88.6)   | 186.7(94.3)   | 799.6(205.0)  | 808.6(207.2)   | 127.4        | 129.8 |

**Table S6. Calculated Values of Ng–Be Binding Energies (BE) (in kJ mol<sup>-1</sup>) in the Predicted NgBeY<sup>+</sup> (Ng = He–Rn; Y = N and P) Complexes as Obtained by Using B3LYP and MP2 Methods with the DEF2 Basis Set and CCSD(T) and MRCI Methods with AVTZ Basis Set.**

| Complexes          | BE (Ng–Be) |       |         |       | BE (Ng–Be) <sup>a</sup> |       |         |
|--------------------|------------|-------|---------|-------|-------------------------|-------|---------|
|                    | B3LYP      | MP2   | CCSD(T) | MRCI  | B3LYP                   | MP2   | CCSD(T) |
| HeBeN <sup>+</sup> | 39.9       | 36.5  | 40.4    | 28.5  | 28.2                    | 22.4  | 24.6    |
| NeBeN <sup>+</sup> | 50.9       | 44.3  | 46.3    | 45.3  | 41.0                    | 37.0  | 43.9    |
| ArBeN <sup>+</sup> | 120.7      | 116.0 | 122.4   | 114.8 | 110.2                   | 105.5 | 112.1   |
| KrBeN <sup>+</sup> | 145.4      | 141.2 | 147.5   | 145.8 | 135.2                   | 131.0 | 137.5   |
| XeBeN <sup>+</sup> | 177.0      | 172.4 | 181.0   | 171.7 | 166.9                   | 162.2 | 171.0   |
| RnBeN <sup>+</sup> | 192.1      | 188.0 | 196.2   | 193.3 | 182.3                   | 177.9 | 186.2   |
| Complexes          | BE (Ng–Be) |       |         |       | BE (Ng–Be) <sup>a</sup> |       |         |
|                    | B3LYP      | MP2   | CCSD(T) | MRCI  | B3LYP                   | MP2   | CCSD(T) |
| HeBeP <sup>+</sup> | 22.3       | 26.5  | 24.3    | 27.1  | 13.6                    | 8.1   | 10.4    |
| NeBeP <sup>+</sup> | 31.3       | 35.2  | 35.7    | 36.4  | 23.9                    | 21.2  | 27.3    |
| ArBeP <sup>+</sup> | 85.5       | 85.1  | 91.5    | 83.1  | 77.7                    | 77.2  | 83.5    |
| KrBeP <sup>+</sup> | 105.6      | 106.6 | 112.5   | 103.7 | 97.9                    | 98.9  | 104.7   |
| XeBeP <sup>+</sup> | 131.0      | 132.9 | 140.4   | 136.7 | 123.5                   | 125.3 | 132.7   |
| RnBeP <sup>+</sup> | 143.7      | 146.5 | 153.4   | 149.8 | 136.3                   | 138.9 | 145.9   |

<sup>a</sup> Corresponds to the Zero Point Energy (ZPE) corrected Ng–Be binding energy.



**Table S7. Calculated Values of Mulliken Atomic Spin Population on the Constituting Atoms in the bare BeY<sup>+</sup> Ions and Predicted NgBeY<sup>+</sup> (Ng = He–Rn; Y = N and P) Complexes in their Triplet Electronic State as Obtained by Using B3LYP and MP2 Methods with the DEF2 Basis Set.**

| Species            | Y | Atomic Spin Population |       |       |       |       |       |
|--------------------|---|------------------------|-------|-------|-------|-------|-------|
|                    |   | Ng                     |       | Be    |       | Y     |       |
|                    |   | B3LYP                  | MP2   | B3LYP | MP2   | B3LYP | MP2   |
| BeY <sup>+</sup>   | N | ...                    | ...   | 0.269 | 0.193 | 1.731 | 1.807 |
|                    | P | ...                    | ...   | 0.294 | 0.214 | 1.706 | 1.786 |
| HeBeY <sup>+</sup> | N | 0.004                  | 0.005 | 0.296 | 0.211 | 1.700 | 1.784 |
|                    | P | 0.005                  | 0.005 | 0.334 | 0.255 | 1.661 | 1.740 |
| NeBeY <sup>+</sup> | N | 0.005                  | 0.004 | 0.295 | 0.209 | 1.700 | 1.787 |
|                    | P | 0.005                  | 0.004 | 0.317 | 0.238 | 1.678 | 1.758 |
| ArBeY <sup>+</sup> | N | 0.006                  | 0.003 | 0.274 | 0.193 | 1.721 | 1.803 |
|                    | P | 0.009                  | 0.005 | 0.301 | 0.220 | 1.691 | 1.775 |
| KrBeY <sup>+</sup> | N | 0.005                  | 0.002 | 0.271 | 0.192 | 1.724 | 1.806 |
|                    | P | 0.008                  | 0.005 | 0.296 | 0.217 | 1.696 | 1.778 |
| XeBeY <sup>+</sup> | N | 0.005                  | 0.001 | 0.263 | 0.187 | 1.732 | 1.812 |
|                    | P | 0.009                  | 0.003 | 0.289 | 0.213 | 1.702 | 1.782 |
| RnBeY <sup>+</sup> | N | 0.006                  | 0.001 | 0.257 | 0.184 | 1.737 | 1.815 |
|                    | P | 0.009                  | 0.004 | 0.281 | 0.210 | 1.709 | 1.785 |

**Table S8. Calculated Values of Mulliken Charges on the Constituting Atoms in the Predicted NgBeY<sup>+</sup> (Ng = He–Rn; Y = N and P) Complexes in their Triplet Electronic State as Obtained by Using B3LYP and MP2 Methods with the DEF2 Basis Set.**

| Complexes          | <i>q</i> (Ng) |       | <i>q</i> (Be) |       | <i>q</i> (N) |       |
|--------------------|---------------|-------|---------------|-------|--------------|-------|
|                    | B3LYP         | MP2   | B3LYP         | MP2   | B3LYP        | MP2   |
| HeBeN <sup>+</sup> | 0.156         | 0.109 | 0.617         | 0.773 | 0.227        | 0.117 |
| NeBeN <sup>+</sup> | 0.140         | 0.104 | 0.624         | 0.773 | 0.235        | 0.122 |
| ArBeN <sup>+</sup> | 0.442         | 0.379 | 0.389         | 0.555 | 0.170        | 0.066 |
| KrBeN <sup>+</sup> | 0.506         | 0.452 | 0.321         | 0.475 | 0.173        | 0.073 |
| XeBeN <sup>+</sup> | 0.597         | 0.548 | 0.238         | 0.383 | 0.164        | 0.070 |
| RnBeN <sup>+</sup> | 0.594         | 0.559 | 0.251         | 0.381 | 0.155        | 0.060 |
| Complexes          | <i>q</i> (Ng) |       | <i>q</i> (Be) |       | <i>q</i> (P) |       |
|                    | B3LYP         | MP2   | B3LYP         | MP2   | B3LYP        | MP2   |
| HeBeP <sup>+</sup> | 0.122         | 0.081 | 0.419         | 0.608 | 0.456        | 0.312 |
| NeBeP <sup>+</sup> | 0.102         | 0.077 | 0.450         | 0.627 | 0.448        | 0.296 |
| ArBeP <sup>+</sup> | 0.379         | 0.338 | 0.247         | 0.449 | 0.373        | 0.213 |
| KrBeP <sup>+</sup> | 0.442         | 0.417 | 0.166         | 0.353 | 0.391        | 0.231 |
| XeBeP <sup>+</sup> | 0.534         | 0.519 | 0.065         | 0.236 | 0.401        | 0.245 |
| RnBeP <sup>+</sup> | 0.537         | 0.537 | 0.070         | 0.228 | 0.393        | 0.235 |

**Table S9. Calculated Values of Natural Bonding Orbital (NBO) Charges on the Constituting Atoms in the Predicted NgBeY<sup>+</sup> (Ng = He–Rn; Y = N and P) Complexes in their Triplet Electronic State as Obtained by Using B3LYP Method with the DEF2 Basis Set.**

| <b>Complexes</b>   | <b><i>q</i>(Ng)</b> | <b><i>q</i>(Be)</b> | <b><i>q</i>(N)</b> |
|--------------------|---------------------|---------------------|--------------------|
| HeBeN <sup>+</sup> | 0.057               | 1.567               | −0.624             |
| NeBeN <sup>+</sup> | 0.053               | 1.572               | −0.625             |
| ArBeN <sup>+</sup> | 0.143               | 1.493               | −0.636             |
| KrBeN <sup>+</sup> | 0.187               | 1.457               | −0.643             |
| XeBeN <sup>+</sup> | 0.249               | 1.406               | −0.655             |
| RnBeN <sup>+</sup> | 0.279               | 1.382               | −0.661             |
| <b>Complexes</b>   | <b><i>q</i>(Ng)</b> | <b><i>q</i>(Be)</b> | <b><i>q</i>(P)</b> |
| HeBeP <sup>+</sup> | 0.055               | 1.150               | −0.205             |
| NeBeP <sup>+</sup> | 0.049               | 1.162               | −0.211             |
| ArBeP <sup>+</sup> | 0.135               | 1.114               | −0.250             |
| KrBeP <sup>+</sup> | 0.176               | 1.086               | −0.262             |
| XeBeP <sup>+</sup> | 0.235               | 1.047               | −0.281             |
| RnBeP <sup>+</sup> | 0.262               | 1.028               | −0.290             |

**Table S10. Calculated Values of Atoms-in-Molecule (AIM) Charges on the Constituting Atoms in the Predicted NgBeY<sup>+</sup> (Ng = He–Rn; Y = N and P) Complexes in their Triplet Electronic State as Obtained by Using B3LYP Method with the DEF2 Basis Set.**

| <b>Complexes</b>   | <b><i>q</i>(Ng)</b> | <b><i>q</i>(Be)</b> | <b><i>q</i>(N)</b> |
|--------------------|---------------------|---------------------|--------------------|
| HeBeN <sup>+</sup> | 0.014               | 1.722               | −0.736             |
| NeBeN <sup>+</sup> | 0.015               | 1.721               | −0.736             |
| ArBeN <sup>+</sup> | 0.053               | 1.697               | −0.751             |
| KrBeN <sup>+</sup> | 0.074               | 1.682               | −0.756             |
| XeBeN <sup>+</sup> | 0.099               | 1.663               | −0.762             |
| RnBeN <sup>+</sup> | 0.115               | 1.654               | −0.769             |
| <b>Complexes</b>   | <b><i>q</i>(Ng)</b> | <b><i>q</i>(Be)</b> | <b><i>q</i>(P)</b> |
| HeBeP <sup>+</sup> | 0.009               | 1.572               | −0.581             |
| NeBeP <sup>+</sup> | 0.010               | 1.571               | −0.581             |
| ArBeP <sup>+</sup> | 0.030               | 1.560               | −0.590             |
| KrBeP <sup>+</sup> | 0.042               | 1.558               | −0.600             |
| XeBeP <sup>+</sup> | 0.070               | 1.541               | −0.611             |
| RnBeP <sup>+</sup> | 0.086               | 1.529               | −0.615             |

**Table S11. Calculated Values of Ng–Y Bond Lengths (R in Å), Binding Energies (BE in kJ mol<sup>-1</sup>), and Harmonic Vibrational Frequencies (ν in cm<sup>-1</sup>) in the Singlet State of Bent NgYBe<sup>+</sup> (Ng = Ar, Kr, Xe, and Rn; Y = N and P) Complexes as Obtained by Using CCSD(T) Method with AVTZ Basis Set.**

| <b>Complexes</b>   | <b>R (Ng–N)</b> | <b>ν (Ng–N)</b> | <b><sup>a</sup>BE (Ng–N)</b> | <b><sup>b</sup>BE (Ng–N)</b> |
|--------------------|-----------------|-----------------|------------------------------|------------------------------|
| ArNBe <sup>+</sup> | 1.975           | 339.1           | 92.0                         | –89.7                        |
| KrNBe <sup>+</sup> | 1.963           | 400.4           | 148.9                        | –32.8                        |
| XeNBe <sup>+</sup> | 2.005           | 468.0           | 237.5                        | 55.8                         |
| RnNBe <sup>+</sup> | 2.115           | 436.6           | 265.2                        | 83.6                         |
| <b>Complexes</b>   | <b>R (Ng–P)</b> | <b>ν (Ng–P)</b> | <b><sup>a</sup>BE (Ng–P)</b> | <b><sup>b</sup>BE (Ng–P)</b> |
| ArPBe <sup>+</sup> | 2.557           | 166.2           | 43.8                         | –68.3                        |
| KrPBe <sup>+</sup> | 2.571           | 196.0           | 67.6                         | –44.5                        |
| XePBe <sup>+</sup> | 2.656           | 224.8           | 107.5                        | –4.6                         |
| RnPBe <sup>+</sup> | 2.712           | 211.2           | 138.1                        | 16.2                         |

<sup>a</sup>Binding energy corresponding to the channel, NgYBe<sup>+</sup> → Ng + <sup>1</sup>BeY<sup>+</sup>

<sup>b</sup>Binding energy corresponding to the channel, NgYBe<sup>+</sup> → Ng + <sup>3</sup>BeY<sup>+</sup>

**Table S12. Relative Energies (in kJ mol<sup>-1</sup>) of the Predicted NgBeY<sup>+</sup> (Ng = Ar, Kr, Xe, and Rn; Y = N and P) in the Singlet and Triplet Electronic States and the Singlet NgYBe<sup>+</sup> Isomer Calculated by Using CCSD(T) Method with AVTZ Basis Set.**

| <b>Ng</b> | <b><sup>3</sup>NgBeN<sup>+</sup></b> | <b><sup>1</sup>NgBeN<sup>+</sup></b> | <b><sup>1</sup>NgNBe<sup>+</sup></b> |
|-----------|--------------------------------------|--------------------------------------|--------------------------------------|
| Ar        | 0.0                                  | 322.6                                | 212.0                                |
| Kr        | 0.0                                  | 388.2                                | 180.3                                |
| Xe        | 0.0                                  | 419.5                                | 125.2                                |
| Rn        | 0.0                                  | 448.7                                | 112.6                                |
| <b>Ng</b> | <b><sup>3</sup>NgBeP<sup>+</sup></b> | <b><sup>1</sup>NgBeP<sup>+</sup></b> | <b><sup>1</sup>NgPBe<sup>+</sup></b> |
| Ar        | 0.0                                  | 199.1                                | 159.8                                |
| Kr        | 0.0                                  | 271.8                                | 157.0                                |
| Xe        | 0.0                                  | 332.9                                | 145.0                                |
| Rn        | 0.0                                  | 362.3                                | 138.5                                |

**Table S13. Calculated Values of Ng–M Bond Critical Point (BCP) Electron Density ( $\rho$  in  $e a_0^{-3}$ ), Laplacian of Electron Density ( $\nabla^2\rho$  in  $e a_0^{-5}$ ), the Local Electron Energy Density ( $E_d$  in au), and Ratio of Local Electron Kinetic Energy Density and Electron Density ( $G/\rho$  in au) in the Predicted NgBeY<sup>+</sup> (Ng = He–Rn; Y = N and P) Complexes in their Triplet Electronic State as Obtained by Using B3LYP and MP2 Methods with the DEF2 Basis Set.**

| Complexes          | $\rho$ |       | $\nabla^2\rho$ |       | $E_d$  |        | $G/\rho$ |       |
|--------------------|--------|-------|----------------|-------|--------|--------|----------|-------|
|                    | B3LYP  | MP2   | B3LYP          | MP2   | B3LYP  | MP2    | B3LYP    | MP2   |
| HeBeN <sup>+</sup> | 0.032  | 0.029 | 0.302          | 0.305 | 0.015  | 0.016  | 1.906    | 2.069 |
| NeBeN <sup>+</sup> | 0.033  | 0.030 | 0.327          | 0.326 | 0.016  | 0.017  | 2.000    | 2.167 |
| ArBeN <sup>+</sup> | 0.046  | 0.044 | 0.242          | 0.250 | −0.001 | −0.001 | 1.348    | 1.409 |
| KrBeN <sup>+</sup> | 0.046  | 0.043 | 0.168          | 0.182 | −0.007 | −0.005 | 1.065    | 1.186 |
| XeBeN <sup>+</sup> | 0.046  | 0.043 | 0.097          | 0.109 | −0.013 | −0.012 | 0.826    | 0.907 |
| RnBeN <sup>+</sup> | 0.045  | 0.043 | 0.069          | 0.083 | −0.015 | −0.014 | 0.733    | 0.791 |
| Complexes          | $\rho$ |       | $\nabla^2\rho$ |       | $E_d$  |        | $G/\rho$ |       |
|                    | B3LYP  | MP2   | B3LYP          | MP2   | B3LYP  | MP2    | B3LYP    | MP2   |
| HeBeP <sup>+</sup> | 0.024  | 0.020 | 0.237          | 0.224 | 0.013  | 0.014  | 1.917    | 2.100 |
| NeBeP <sup>+</sup> | 0.025  | 0.022 | 0.250          | 0.248 | 0.014  | 0.014  | 1.960    | 2.182 |
| ArBeP <sup>+</sup> | 0.039  | 0.037 | 0.225          | 0.234 | −0.002 | −0.004 | 1.385    | 1.486 |
| KrBeP <sup>+</sup> | 0.040  | 0.038 | 0.163          | 0.178 | −0.004 | −0.002 | 1.100    | 1.237 |
| XeBeP <sup>+</sup> | 0.040  | 0.038 | 0.102          | 0.115 | −0.009 | −0.008 | 0.875    | 0.974 |
| RnBeP <sup>+</sup> | 0.040  | 0.038 | 0.077          | 0.091 | −0.011 | −0.010 | 0.775    | 0.868 |
